# Supplementary material for: Molecular Characterization and Assessment of Risk Factors Associated with Theileria annulata Infection
Source: MDPI journal article supplement (doi:10.3390/microorganisms10081614), 2022-08-09
Supplement: s1 [file s1]

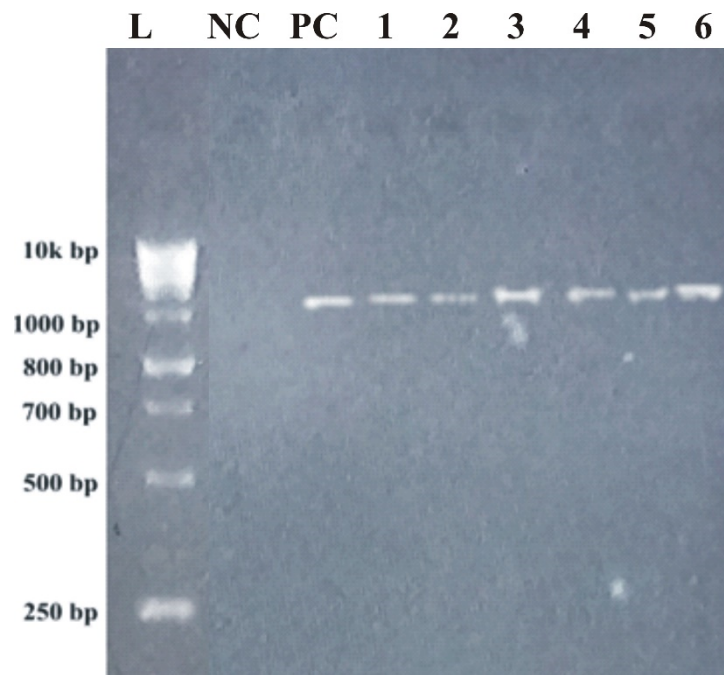

**Figure S1.** The PCR based amplified products containing fragment (1093 bp) DNA amplified through species-specific primers (Lane 1-6), for *Theileria annulata*, respectively. The positive control (*Theileria annulata*) is shown as PC and negative control as NC (PCR water instead of template DNA).
